# Supplementary material for: High Content Analysis of Macrophage-Targeting EhPIb-Compounds against Cutaneous and Visceral Leishmania Species
Source: MDPI journal article supplement (doi:10.3390/microorganisms9020422), 2021-02-18
Supplement: s1 [file s1]

## Supplementary tables

Table S1: Image analysis sequence established in Harmony software.

| Analysis building block                | Objective/ Specification                                                                          | Parameters                                                                                                                                   |                                                                                             |                                                                |
|----------------------------------------|---------------------------------------------------------------------------------------------------|----------------------------------------------------------------------------------------------------------------------------------------------|---------------------------------------------------------------------------------------------|----------------------------------------------------------------|
| <b>FIND NUCLEI</b>                     | <b>Image segmentation:</b><br>Determines host cell nuclei                                         | Channel:<br>ROI:<br>Method:<br>Common<br>Threshold:<br>Area:<br>Split Factor:<br>Individual<br>Threshold:<br>Contrast:<br>Output Population: | DAPI<br>None<br>B<br>0.02<br>> 40 $\mu\text{m}^2$<br>16.9<br>0.14<br>> -0.71<br>Macrophages |                                                                |
| <b>FIND CYTOPLASM</b>                  | <b>Image segmentation:</b><br>Identifies host cell cytoplasm and defines single cells             | Channel:<br>Nuclei:<br>Method:<br><br>Individual<br>Threshold:                                                                               | Alexa 647<br>Macrophages<br>A<br><br>0.06                                                   |                                                                |
| <b>CALCULATE INTENSITY PROPERTIES</b>  | <b>Define regions of interest:</b><br>Quantifies properties in regions and removes border objects | Channel:<br>Population:<br>Region:<br>Method:<br>Mean Property<br>Prefix:                                                                    | DAPI<br>Macrophages<br>Nucleus<br>Standard<br>Nucleus DAPI                                  | Alexa 647<br>Macrophages<br>Cell<br>Standard<br>Cell Alexa 647 |
| <b>CALCULATE MORPHOLOGY PROPERTIES</b> |                                                                                                   | Population:<br>Region:<br>Method:<br>Property Prefix:                                                                                        | Macrophages<br>Nucleus<br>Standard (area/ roundness)<br>Nucleus                             |                                                                |
| <b>FIND SPOTS</b>                      | <b>Image Segmentation:</b><br>Identifies intracellular spots within the region of interest        | Channel:<br>ROI:                                                                                                                             | Alexa 647<br>Macrophages                                                                    |                                                                |
|                                        |                                                                                                   | ROI Region:<br>Method:<br>Detection<br>Sensitivity:<br>Splitting<br>Coefficient:<br>Calculate Spot<br>Properties<br>Output Population:       | Cell<br>B<br>0.11<br>0.844<br>Spots                                                         |                                                                |
| <b>CALCULATE MORPHOLOGY PROPERTIES</b> | <b>Define properties of spots:</b><br>Quantification and calculation                              | Input Population:<br>Region:                                                                                                                 | Spots<br>Spot                                                                               |                                                                |
|                                        |                                                                                                   | Method:<br>Output Property<br>Prefix:                                                                                                        | Standard (area / roundness/ width/ length/ ratio width to length)<br>Spot                   |                                                                |
|                                        |                                                                                                   | Input Channel:<br>Population:                                                                                                                | Alexa 647<br>Spots                                                                          | DAPI<br>Spots                                                  |

|                                       |                                                                                                           |                                                                                                                                                                                                                                                      |                                                                                                                                                                                                                                              |                                                 |
|---------------------------------------|-----------------------------------------------------------------------------------------------------------|------------------------------------------------------------------------------------------------------------------------------------------------------------------------------------------------------------------------------------------------------|----------------------------------------------------------------------------------------------------------------------------------------------------------------------------------------------------------------------------------------------|-------------------------------------------------|
| <b>CALCULATE INTENSITY PROPERTIES</b> | of intracellular parasites                                                                                | Region:<br><br>Method:<br><br>Output: Property Prefix:                                                                                                                                                                                               | Spot Standard (mean/ standard deviation/ coefficient of variance/ median)<br>Intensity Spot Alexa 647                                                                                                                                        | Spot Standard (mean)<br><br>Intensity Spot DAPI |
| <b>CALCULATE PROPERTIES</b>           |                                                                                                           | Population:<br>Method:<br>Formula:<br>Variable A:<br>Variable B:<br>Output Property:                                                                                                                                                                 | Spots<br>By Formula<br>A/B<br>Spot Alexa 647 mean<br>Spot DAPI mean<br>ALEXA/ DAPI intensity ratio                                                                                                                                           |                                                 |
| <b>SELECT POPULATION I</b>            | <b>Identify intracellular <i>Leishmania</i> parasites:</b><br>Selects parasites from false-positive spots | Input Population:<br>Method:<br>Number of Classes:                                                                                                                                                                                                   | Spots<br>Linear Classifier<br>2                                                                                                                                                                                                              |                                                 |
|                                       |                                                                                                           | Relative Spot Intensity<br>Corrected Spot Intensity<br>Uncorrected Spot Peak Intensity<br>Spot Contrast<br>Spot Background Intensity<br>Spot Area [px <sup>2</sup> ]<br>Region Intensity<br>Spot to Region Intensity<br>Spot Area [μm <sup>2</sup> ] | Spot Roundness<br>Spot Width [μm]<br>Spot Length [μm]<br>Spot Ratio Width to Length<br>Spot Alexa 568 Mean<br>Spot DAPI Mean<br>ALEXA/DAPI intensity ratio<br>Intensity Surrounding Alexa 568 Mean<br>Intensity Surrounding Alexa 568 Median |                                                 |
|                                       |                                                                                                           | Output Population A:<br>Output Population B:                                                                                                                                                                                                         | Likely <i>Leishmania</i><br>False-positive                                                                                                                                                                                                   |                                                 |
|                                       |                                                                                                           | Population:                                                                                                                                                                                                                                          | Spots                                                                                                                                                                                                                                        |                                                 |
|                                       |                                                                                                           | Method:<br>Likely <i>Leishmania</i> :<br>Output Population:                                                                                                                                                                                          | Filter by property<br>>0<br>Spots selected                                                                                                                                                                                                   |                                                 |
|                                       |                                                                                                           | Population:<br>Method:<br>Spot Area [μm <sup>2</sup> ]:<br>ALEXA/DAPI intensity ratio:<br>Spot Area [μm <sup>2</sup> ]:<br>Corrected Spot Intensity:<br>Boolean Operations:                                                                          | Spots selected<br>Filter by Property<br>> 4<br>> 0.3<br>< 35<br>> 100 (Staining-dependent)<br>F1 and F2 and F3 and F4                                                                                                                        |                                                 |
|                                       |                                                                                                           |                                                                                                                                                                                                                                                      |                                                                                                                                                                                                                                              |                                                 |
| <b>CALCULATE PROPERTIES</b>           | <b>Macrophages and parasites are brought into relation</b>                                                | Population:<br>Method:<br>Related Population:<br>Number of <i>Leishmania</i><br>Output: Property<br>Suffix:                                                                                                                                          | Macrophages<br>By related population<br><br><i>Leishmania</i><br><br>Per Cell                                                                                                                                                                |                                                 |
|                                       |                                                                                                           | Population:<br>Method:                                                                                                                                                                                                                               | Macrophages<br>Filter by Property                                                                                                                                                                                                            |                                                 |

|                                            |                                                                                                                            |                                                                                                                                                                                                                                               |                                                                                                                                                                                                                                                                                                                                                                                                                                                                                                                                                                  |
|--------------------------------------------|----------------------------------------------------------------------------------------------------------------------------|-----------------------------------------------------------------------------------------------------------------------------------------------------------------------------------------------------------------------------------------------|------------------------------------------------------------------------------------------------------------------------------------------------------------------------------------------------------------------------------------------------------------------------------------------------------------------------------------------------------------------------------------------------------------------------------------------------------------------------------------------------------------------------------------------------------------------|
| <p><b>SELECT<br/>POPULATION<br/>II</b></p> | <p><b>Identify<br/>subpopulation:</b><br/>Defines infected cells within the total population</p>                           | <p>Number of Leishmania – per cell:<br/>Output Population:<br/>Number of Leishmania – per cell:<br/>Output Population:<br/>Number of Leishmania – per cell:<br/>Output Population:</p>                                                        | <p>&gt;0<br/>Infected macrophages<br/>&gt;=2<br/>Double infected macrophages<br/>&gt;0<br/>Seriously infected macrophages</p>                                                                                                                                                                                                                                                                                                                                                                                                                                    |
| <p><b>DEFINE<br/>RESULTS</b></p>           | <p><b>Readout values:</b><br/>Calculates readout values and measures the biological effects visible in the input image</p> | <p>Method:<br/>Population:<br/>Population:<br/>Population:<br/>Population:<br/><br/>Method:<br/>Formula:<br/>Population Type:<br/><br/>Variable A:<br/>number of objects<br/><br/>Variable B:<br/>number of objects<br/><br/>Output name:</p> | <p>List of outputs<br/>Macrophages - number of objects<br/>Leishmania - number of objects<br/>Infected macrophages - number of objects<br/>Seriously infected macrophages - number of objects<br/><br/>Formula Output<br/>1. a/b 2. to 4. a/b*100<br/>Objects<br/>1. Leishmania<br/>2. Infected macrophages<br/>3. Seriously infected macrophages<br/>4. Double infected macrophages<br/><br/>Macrophages<br/>1. Leishmania per infected macrophage<br/>2. % infected macrophages<br/>3. % seriously infected macrophages<br/>4. Double infected macrophages</p> |

Table S2: Structures of *Eh*PIb compounds and IC<sub>50</sub> determination.

| Compound                                                                                           | <i>Leishmania</i> ssp.                                                                | IC <sub>50</sub> [95% CI]                                | r <sup>2</sup>                                       |
|----------------------------------------------------------------------------------------------------|---------------------------------------------------------------------------------------|----------------------------------------------------------|------------------------------------------------------|
| <b>Eh-1</b><br>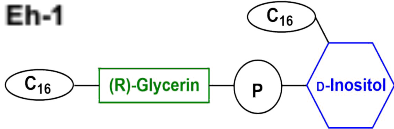   | <i>L. major</i><br><i>L. braziliensis</i><br><i>L. donovani</i><br><i>L. infantum</i> | NA<br>NA<br>NA<br>NA                                     | $\leq 0.5$<br>$\leq 0.5$<br>$\leq 0.5$<br>$\leq 0.5$ |
| <b>Eh-2</b><br>   | <i>L. major</i><br><i>L. braziliensis</i><br><i>L. donovani</i><br><i>L. infantum</i> | NA<br>NA<br>NA<br>NA                                     | $\leq 0.5$<br>$\leq 0.5$<br>$\leq 0.5$<br>$\leq 0.5$ |
| <b>Eh-3</b><br>   | <i>L. major</i><br><i>L. braziliensis</i><br><i>L. donovani</i><br><i>L. infantum</i> | NA<br>NA<br>NA<br>NA                                     | $\leq 0.5$<br>$\leq 0.5$<br>$\leq 0.5$<br>$\leq 0.5$ |
| <b>Eh-4</b><br>   | <i>L. major</i><br><i>L. braziliensis</i><br><i>L. donovani</i><br><i>L. infantum</i> | NA<br>NA<br>NA<br>NA                                     | $\leq 0.5$<br>$\leq 0.5$<br>$\leq 0.5$<br>$\leq 0.5$ |
| <b>Eh-5</b><br>  | <i>L. major</i><br><i>L. braziliensis</i><br><i>L. donovani</i><br><i>L. infantum</i> | NA<br>NA<br>0.93 [0.48 to 1.48]<br>NA                    | $\leq 0.5$<br>$\leq 0.5$<br>0.9260<br>$\leq 0.5$     |
| <b>Eh-6</b><br> | <i>L. major</i><br><i>L. braziliensis</i><br><i>L. donovani</i><br><i>L. infantum</i> | NA<br>4.685 [2.91 to 7.16]<br>2.294 [1.20 to 3.73]<br>NA | $\leq 0.5$<br>0.5929<br>0.7778<br>$\leq 0.5$         |

Abbreviations: NA = not available, CI = confidence interval

## Supplementary figures

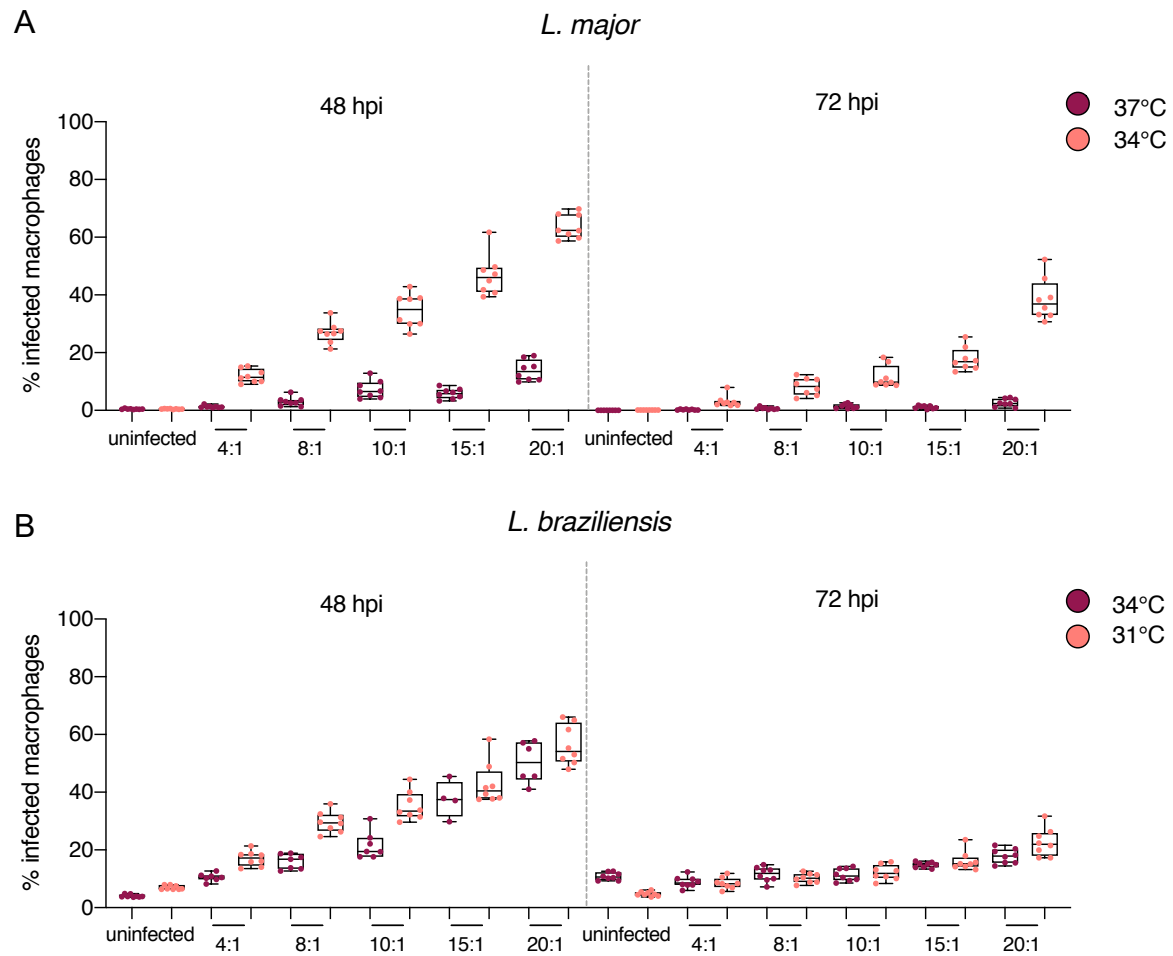

**Figure S1: Influence on assay temperature for infection with cutaneous *Leishmania* species.**

Percentage of infected bone-marrow derived macrophages (BMDMs) infected with **(A)** *L. major* (37°C, 34°C) or **(B)** *L. braziliensis* (34°C, 31°C) at different incubation temperatures and different multiplicities of infection (MOIs; 4:1/8:1/10:1/15:1/20:1) after 48 h and 72 h post infection. Data is expressed as boxplots with whiskers from minimum to maximum of percent of infected macrophages (n=8).
